# Supplementary material for: Stable perovskite solar cells with exfoliated graphite as an ion diffusion-blocking layer
Source: Royal Society of Chemistry journal article supplement (doi:10.1039/d4ta04853a), 2024-01-01
Supplement: d4ta04853a1.pdf [file d4ta04853a1.pdf]

## Supporting Information

### Stable Perovskite Solar Cells via exfoliated graphite as an ion diffusion-blocking layer

Abdullah S. Alharbi<sup>1+</sup>, Miqad S. Albishi<sup>1+</sup>, Temur Maksudov<sup>2</sup>, Tariq F. Alhuwaymel<sup>1</sup>, Chrysa Aivalioti<sup>2</sup>, Kadi S. AlShebl<sup>1</sup>, Naif R. Alshamrani<sup>1</sup>, Furkan H. Isikgor<sup>2</sup>, Mubarak Aldosari<sup>1</sup>, Majed M. Aljomah<sup>1</sup>, Konstantinos Petridis,<sup>3</sup> Thomas D. Anthopoulos<sup>2,4</sup>, George Kakavelakis<sup>3,\*</sup>, Essa A. Alharbi<sup>1,2\*</sup>

<sup>1</sup> Microelectronics and Semiconductor Institute, King Abdulaziz City for Science and Technology (KACST), Riyadh 11442, Saudi Arabia

<sup>2</sup> KAUST Solar Center (KSC), King Abdullah University of Science and Technology (KAUST), Thuwal 23955-6900, Saudi Arabia

<sup>3</sup> Department of Electronic Engineering, School of Engineering, Hellenic Mediterranean University, Romanou 3, Chalepa, Chania, Crete GR-73100, Greece

<sup>4</sup> Henry Royce Institute and Photon Science Institute, Department of Electrical and Electronic Engineering, The University of Manchester, Manchester M13 9PL, UK

+ These authors contributed equally to this work

\* **Authors to whom correspondence should be addressed: kakavelakis@hmu.gr and ealharbi@kacst.edu.sa**

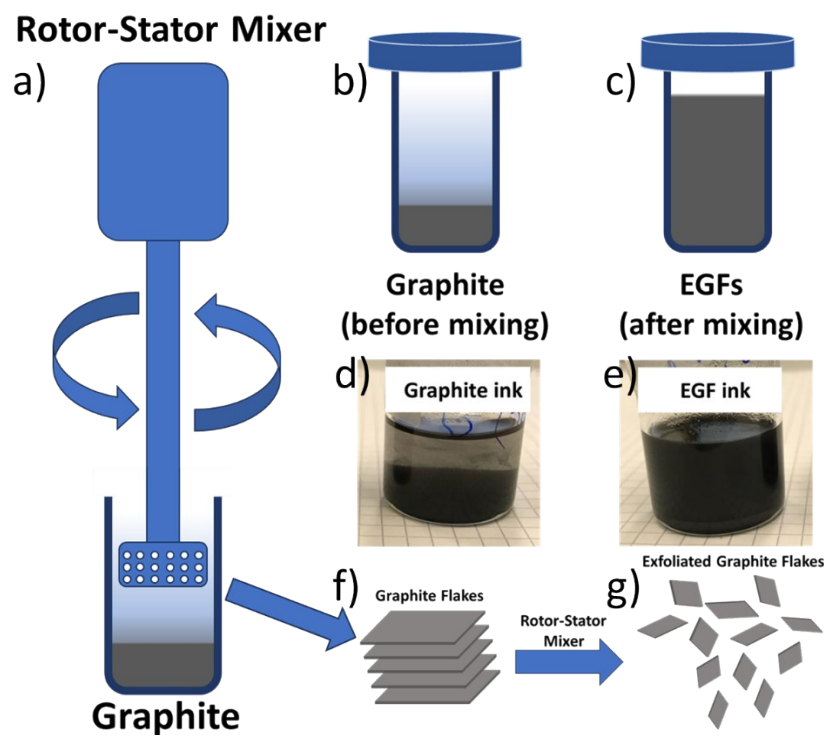

**Figure S1.** (a) Schematic illustration of RSM exfoliation/fragmentation process. Schematic illustration and images of the graphite flakes and inks (b,d,f) before and (c,e,g) after the RMS process application to the precursor dispersion.

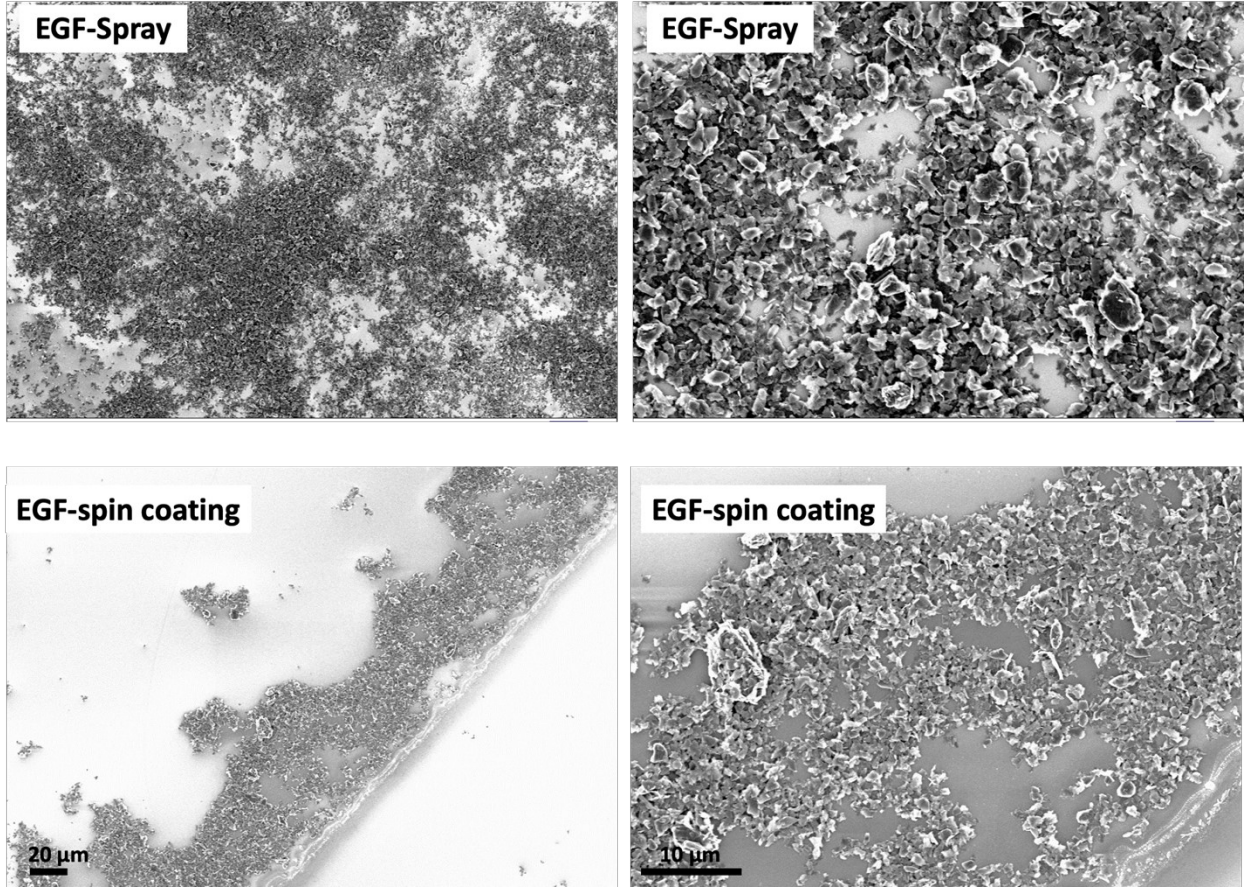

**Figure S2.** Top-view SEM images comparing the surface coverage of graphene flakes deposited through spray- and spin-coating techniques.

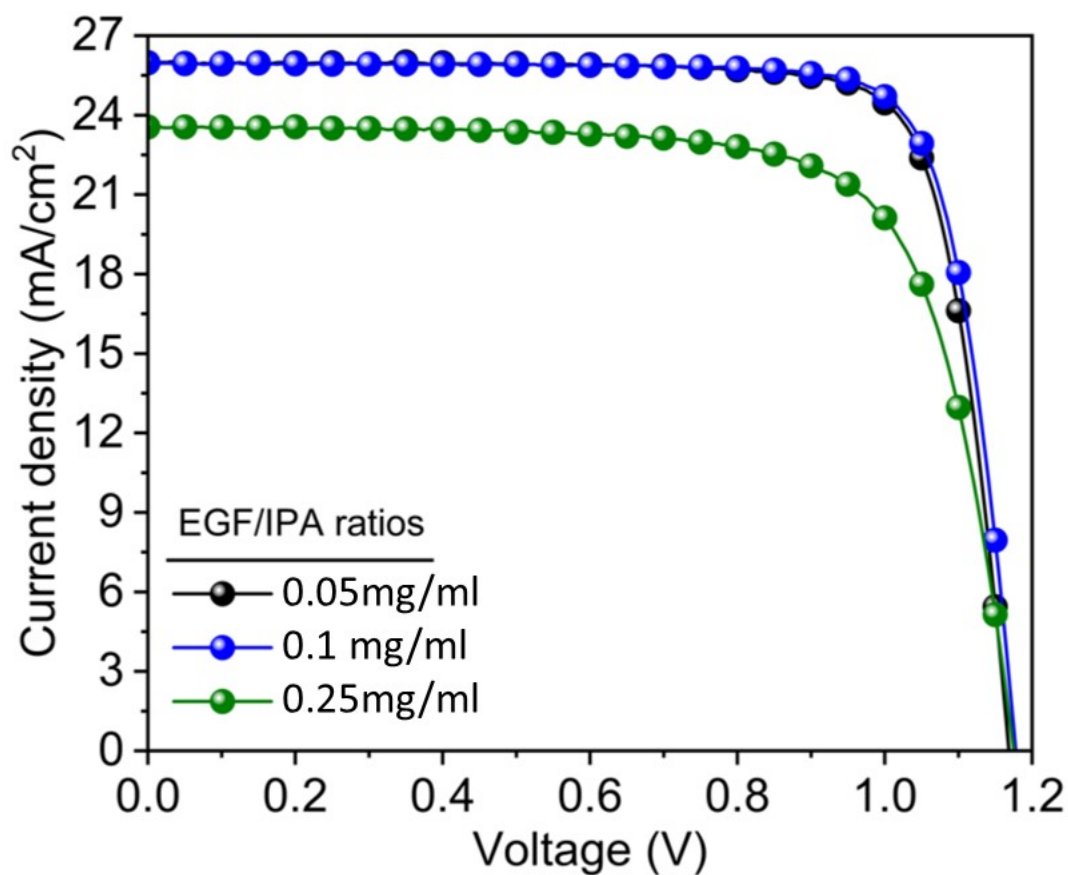

Figure S3. *J-V* characteristics curves using different EGF/ethanol ratio solutions.

Table S1. PV parameters extracted from Figure S6

| EGF to IPA ratio | V <sub>oc</sub> (V) | J <sub>sc</sub> (mA/cm <sup>2</sup> ) | FF(%) | PCE(%) |        |
|------------------|---------------------|---------------------------------------|-------|--------|--------|
| 0.05 mg/ml       | 1.165               | 25.97                                 | 81.1  | 24.54  |        |
| 0.1 mg/ml        | 1.178               | 25.98                                 | 81.4  | 25.0   | Target |
| 0.25 mg/ml       | 1.174               | 24.15                                 | 73.5  | 20.84  |        |

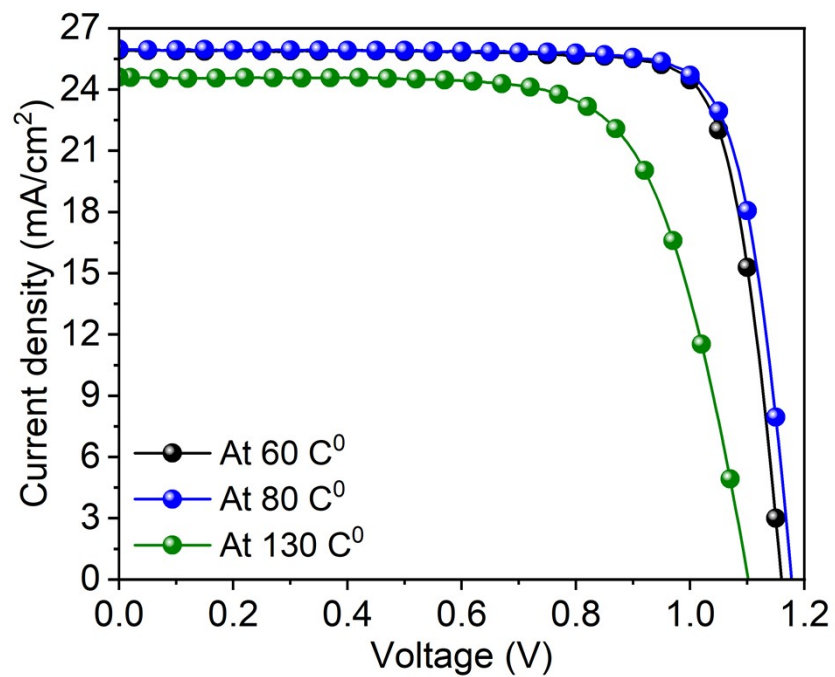

Figure S4.  $J$ - $V$  characteristics curves at different preparation temperatures.

Table S2. PV parameters extracted from Figure S7

| Temperature | $V_{oc}$ (V) | $J_{sc}$ (mA/cm <sup>2</sup> ) | FF(%) | PCE(%) |        |
|-------------|--------------|--------------------------------|-------|--------|--------|
| 60          | 1.153        | 25.92                          | 82.0  | 24.51  |        |
| 80          | 1.178        | 25.98                          | 81.4  | 25.0   | Target |
| 130         | 1.090        | 24.60                          | 71.3  | 19.12  |        |

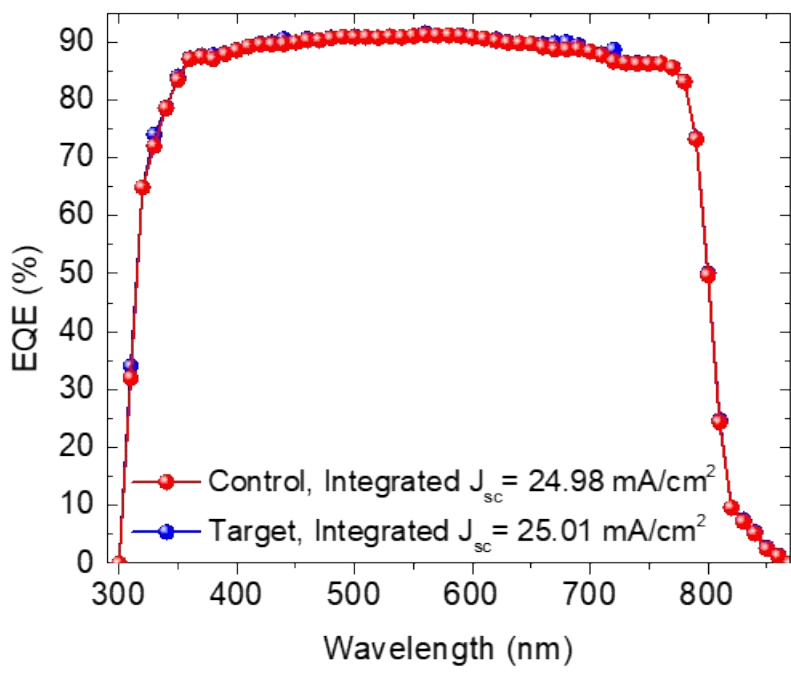

Figure S5. EQE spectra and photocurrent integrated over the standard AM 1.5G solar spectrum

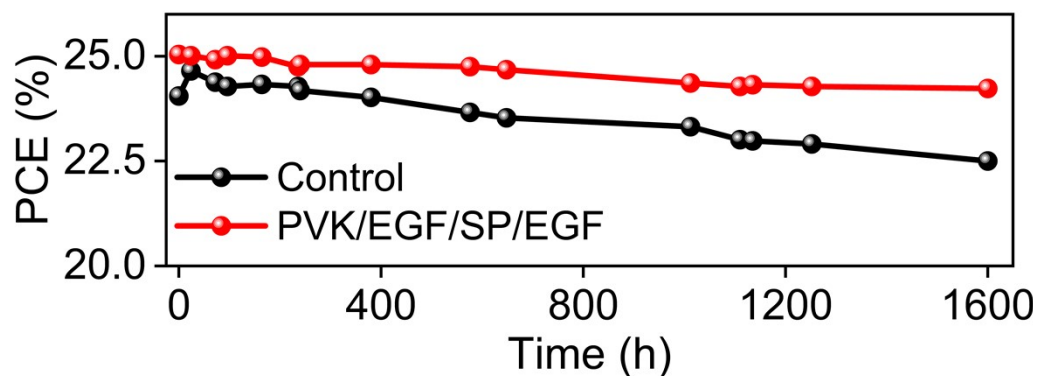

Figure S6. Shelf stability at RT and under ~8% RH of the control and target devices using Spiro-OMeTAD as HTL.

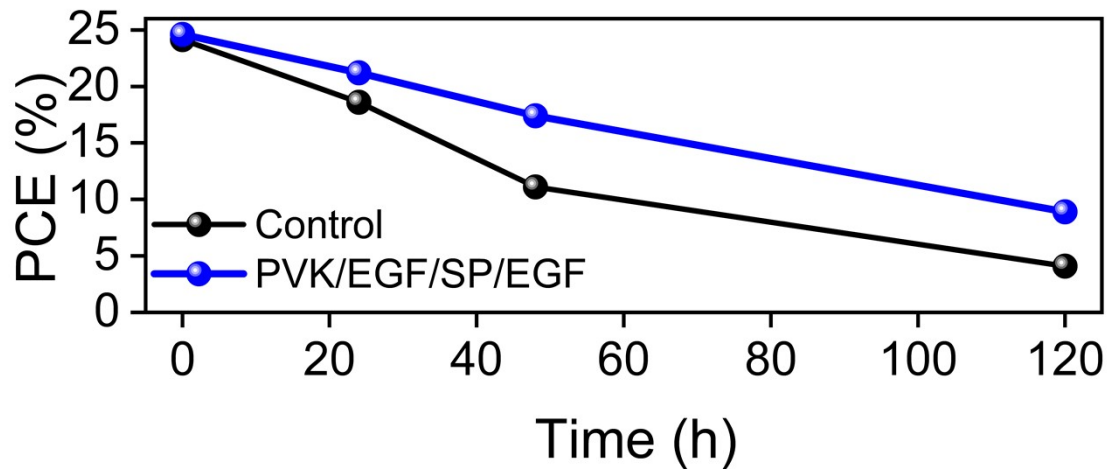

**Figure S7.** Shelf stability at 80 °C and ~75% RH of the control and target samples using Spiro-OMeTAD as the HTL.

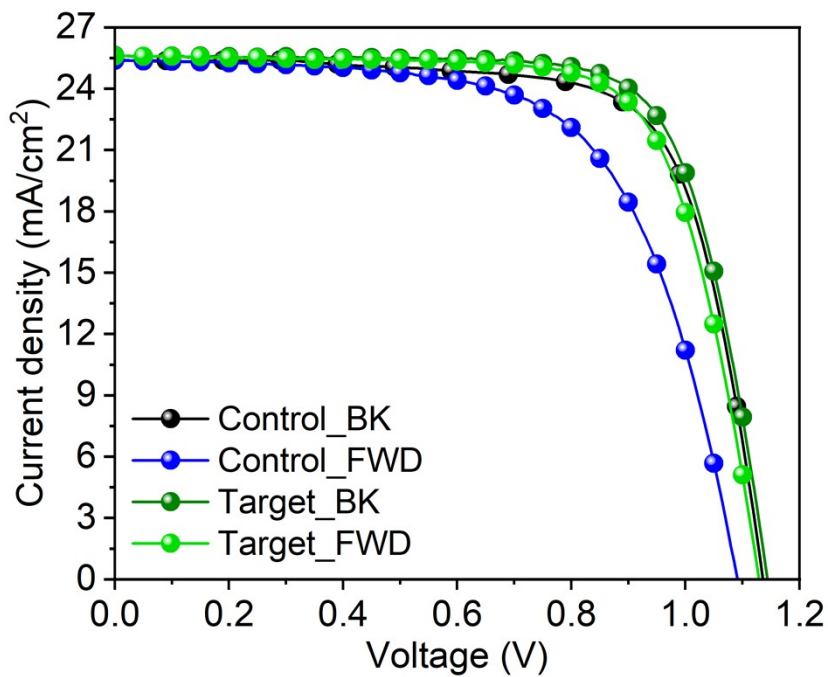

**Figure S8.**  $J-V$  results for devices using PTAA as HTL for control and target devices.

**Table S3.** PV parameters extracted from Figure S10

|     | $V_{oc}$ (V) | $J_{sc}$ (mA/cm <sup>2</sup> ) | FF(%) | PCE(%) |         |
|-----|--------------|--------------------------------|-------|--------|---------|
| Bk  | 1.132        | 25.41                          | 72.50 | 20.86  | control |
| FWD | 1.070        | 25.39                          | 63.70 | 17.31  | control |
| Bk  | 1.142        | 25.62                          | 74.4  | 21.77  | Target  |
| FWD | 1.121        | 25.61                          | 73.3  | 21.04  | Target  |

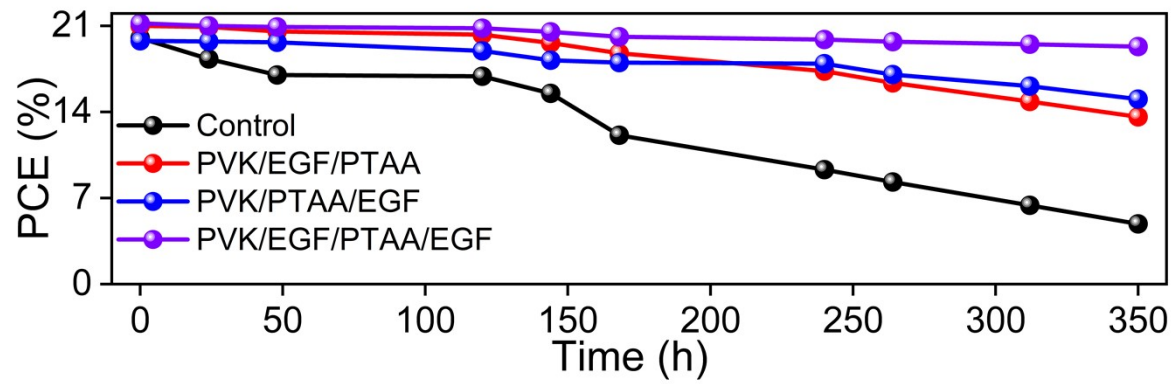

**Figure S9.** Shelf stability at RT and ~8% RH of control and target devices using PTAA as HTL.
